# Supplementary material for: Additive Effects of Sediment and Nutrient on Leaf Litter Decomposition and Macroinvertebrates in Hyporheic Zone
Source: MDPI journal article supplement (doi:10.3390/w13101340), 2021-05-12
Supplement: s1 [file s1]

S3 A summary of all the invertebrate taxa caught in litter bags for three types of habitat-treatment group. NA indicates that identification was conducted only at the order level.

|               |                  | Surface           |       | Hyporheic (control) |       | Hyporheic (treatment) |       |
|---------------|------------------|-------------------|-------|---------------------|-------|-----------------------|-------|
| Order         | Family           | Mean $\pm$ SD     | Total | Mean $\pm$ SD       | Total | Mean $\pm$ SD         | Total |
| Ephemeroptera | Ephemerellidae   | 4.54 $\pm$ 6.29   | 109   | 1.63 $\pm$ 5.55     | 39    | 1.21 $\pm$ 4.12       | 29    |
| Ephemeroptera | Ephemeridae      | 0.58 $\pm$ 1.53   | 14    | 0.75 $\pm$ 2.44     | 18    | 0.00 $\pm$ 0.00       | 0     |
| Ephemeroptera | Heptageniidae    | 0.17 $\pm$ 0.48   | 4     | 0.13 $\pm$ 0.45     | 3     | 0.08 $\pm$ 0.28       | 2     |
| Ephemeroptera | Leptophlebiidae  | 1.58 $\pm$ 2.21   | 38    | 1.79 $\pm$ 3.82     | 43    | 0.92 $\pm$ 2.60       | 22    |
| Plecoptera    | Chloroperlidae   | 0.00 $\pm$ 0.00   | 0     | 0.08 $\pm$ 0.28     | 2     | 0.50 $\pm$ 0.98       | 12    |
| Plecoptera    | Nemouridae       | 0.54 $\pm$ 1.22   | 13    | 0.75 $\pm$ 1.89     | 18    | 0.13 $\pm$ 0.34       | 3     |
| Plecoptera    | Perlodidae       | 1.96 $\pm$ 3.07   | 47    | 0.17 $\pm$ 0.64     | 4     | 0.04 $\pm$ 0.20       | 1     |
| Trichoptera   | Hydropsychidae   | 23.96 $\pm$ 50.24 | 575   | 0.21 $\pm$ 0.66     | 5     | 0.04 $\pm$ 0.20       | 1     |
| Trichoptera   | Lepidostomatidae | 7.17 $\pm$ 12.08  | 172   | 9.42 $\pm$ 12.39    | 226   | 5.96 $\pm$ 7.46       | 143   |
| Trichoptera   | Rhyacophylidae   | 0.17 $\pm$ 0.48   | 4     | 0.00 $\pm$ 0.00     | 0     | 0.00 $\pm$ 0.00       | 0     |
| Trichoptera   | Stenopsychidae   | 0.71 $\pm$ 2.01   | 17    | 0.21 $\pm$ 0.83     | 5     | 0.04 $\pm$ 0.20       | 1     |
| Diptera       | Chironomidae     | 26.17 $\pm$ 19.86 | 628   | 15.29 $\pm$ 12.01   | 367   | 13.67 $\pm$ 10.45     | 328   |
| Diptera       | Tipulidae        | 0.17 $\pm$ 0.48   | 4     | 0.25 $\pm$ 0.61     | 6     | 0.17 $\pm$ 0.38       | 4     |
| Oligochaeta   | NA               | 1.21 $\pm$ 2.73   | 29    | 1.50 $\pm$ 3.04     | 36    | 2.21 $\pm$ 2.70       | 53    |
| Coleoptera    | Elmidae          | 1.63 $\pm$ 3.59   | 39    | 0.38 $\pm$ 1.13     | 9     | 0.04 $\pm$ 0.20       | 1     |
| Odonata       | NA               | 0.08 $\pm$ 0.41   | 2     | 0.00 $\pm$ 0.00     | 0     | 0.00 $\pm$ 0.00       | 0     |
| Total         |                  | 1695              |       | 781                 |       | 600                   |       |
