# Supplementary material for: Additive Effects of Sediment and Nutrient on Leaf Litter Decomposition and Macroinvertebrates in Hyporheic Zone
Source: MDPI journal article supplement (doi:10.3390/w13101340), 2021-05-12
Supplement: s1 [file s1]

**S2** A summary of sampling dates of water in 2019 for the measurements of electrical conductivity, pH, dissolved oxygen in the surface-water (benthic) zone (a), nitrate in the surface-water zone (b), and nitrate in the hyporheic zone (c). Numbers in bracketed superscripts indicate replicated samples measured at each site; no superscripts indicate one sample. N denotes sample sizes.

(a)

| Site | Habitat type | Dates                                                            | N |
|------|--------------|------------------------------------------------------------------|---|
| A1   | Surface      | 9/7 <sup>(3)</sup> , 10/12 <sup>(3)</sup> , 10/24 <sup>(3)</sup> | 9 |
| L1   | Surface      | 9/7 <sup>(3)</sup> , 10/12, 10/25 <sup>(3)</sup>                 | 7 |
| S1   | Surface      | 9/7 <sup>(3)</sup> , 10/10 <sup>(3)</sup> , 10/26 <sup>(3)</sup> | 9 |
| L7   | Surface      | 9/8 <sup>(3)</sup> , 10/12 <sup>(3)</sup> , 11/8 <sup>(3)</sup>  | 9 |

(b)

| Site | Habitat type | Dates             | N |
|------|--------------|-------------------|---|
| A1   | Surface      | 9/7, 10/12, 10/24 | 3 |
| L1   | Surface      | 9/7, 10/12, 10/25 | 3 |
| S1   | Surface      | 9/8, 10/10, 10/26 | 3 |
| L7   | Surface      | 9/7, 10/12, 10/26 | 3 |

(c)

| Site | Habitat type | Treatment type | Dates                                  | N |
|------|--------------|----------------|----------------------------------------|---|
| A1   | Hyporheic    | Control        | 9/7, 10/24                             | 2 |
|      |              | Treatment      | 9/7, 10/24                             | 2 |
| L1   | Hyporheic    | Control        | 9/7, 10/25                             | 2 |
|      |              | Treatment      | Sample loss due to washout of the well | 0 |
| S1   | Hyporheic    | Control        | 9/8, 10/10, 10/26                      | 3 |
|      |              | Treatment      | 9/8, 10/10, 10/26                      | 3 |
| L7   | Hyporheic    | Control        | 9/7, 10/26                             | 2 |
|      |              | Treatment      | 9/7, 10/26                             | 2 |
