# Supplementary material for: Additive Effects of Sediment and Nutrient on Leaf Litter Decomposition and Macroinvertebrates in Hyporheic Zone
Source: MDPI journal article supplement (doi:10.3390/w13101340), 2021-05-12
Supplement: s1 [file s1]

**S1** A summary of litter bag collection schedule in the surface-water (benthic) and hyporheic zones. Numbers in bracketed superscripts denote the number of bags retrieved for the surface-water zone and the number of pits excavated for retrieving traps for the hyporheic zone.

| Site | Habitat type | Installation date | Collection date                                                  |
|------|--------------|-------------------|------------------------------------------------------------------|
|      |              | 2019              | 2019                                                             |
| A1   | Surface      | 7/8               | 8/8 <sup>(2)</sup> , 9/7 <sup>(2)</sup> , 10/12 <sup>(2)</sup>   |
|      | Hyporheic    |                   | 9/7 <sup>(2)</sup> , 10/24 <sup>(4)</sup>                        |
| L1   | Surface      | 7/8               | 8/8 <sup>(2)</sup> , 9/7 <sup>(2)</sup> , 10/10 <sup>(2)</sup>   |
|      | Hyporheic    |                   | 9/7 <sup>(2)</sup> , 10/25 <sup>(4)</sup>                        |
| S1   | Surface      | 7/9               | 8/8 <sup>(2)</sup> , 9/8 <sup>(2)</sup> , 10/10 <sup>(2)</sup>   |
|      | Hyporheic    |                   | 9/8 <sup>(2)</sup> , 10/10 <sup>(2)</sup> , 10/26 <sup>(2)</sup> |
| L7   | Surface      | 7/9               | 8/8 <sup>(2)</sup> , 9/7 <sup>(2)</sup> , 10/12 <sup>(2)</sup>   |
|      | Hyporheic    |                   | 9/7 <sup>(2)</sup> , 10/26 <sup>(1)</sup> , 11/08 <sup>(3)</sup> |
