# Supplementary material for: Additive Effects of Sediment and Nutrient on Leaf Litter Decomposition and Macroinvertebrates in Hyporheic Zone
Source: MDPI journal article supplement (doi:10.3390/w13101340), 2021-05-12
Supplement: s1 [file s1]

(a)

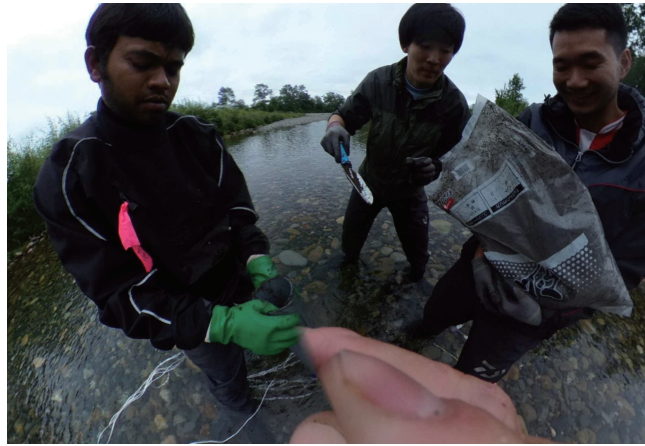

(b)

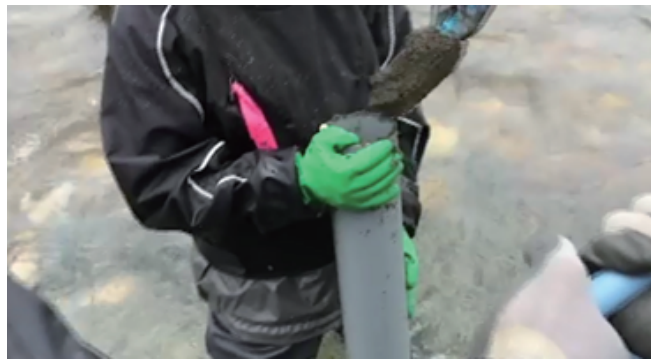

(c)

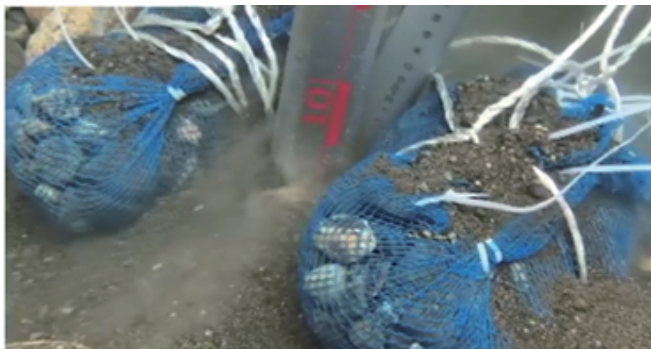

### S3 Alam et al.

Photos showing how experimental treatment was conducted with a group of people and a bag commercially available fine sediment in a bag (a), how fine sediment was introduced into a PVC pipe which directly delivered sediment to the top of the traps in water (b), and the introduced sediment deposited on the top of traps in water (c).
