# Supplementary material for: Additive Effects of Sediment and Nutrient on Leaf Litter Decomposition and Macroinvertebrates in Hyporheic Zone
Source: MDPI journal article supplement (doi:10.3390/w13101340), 2021-05-12
Supplement: s1 [file s1]

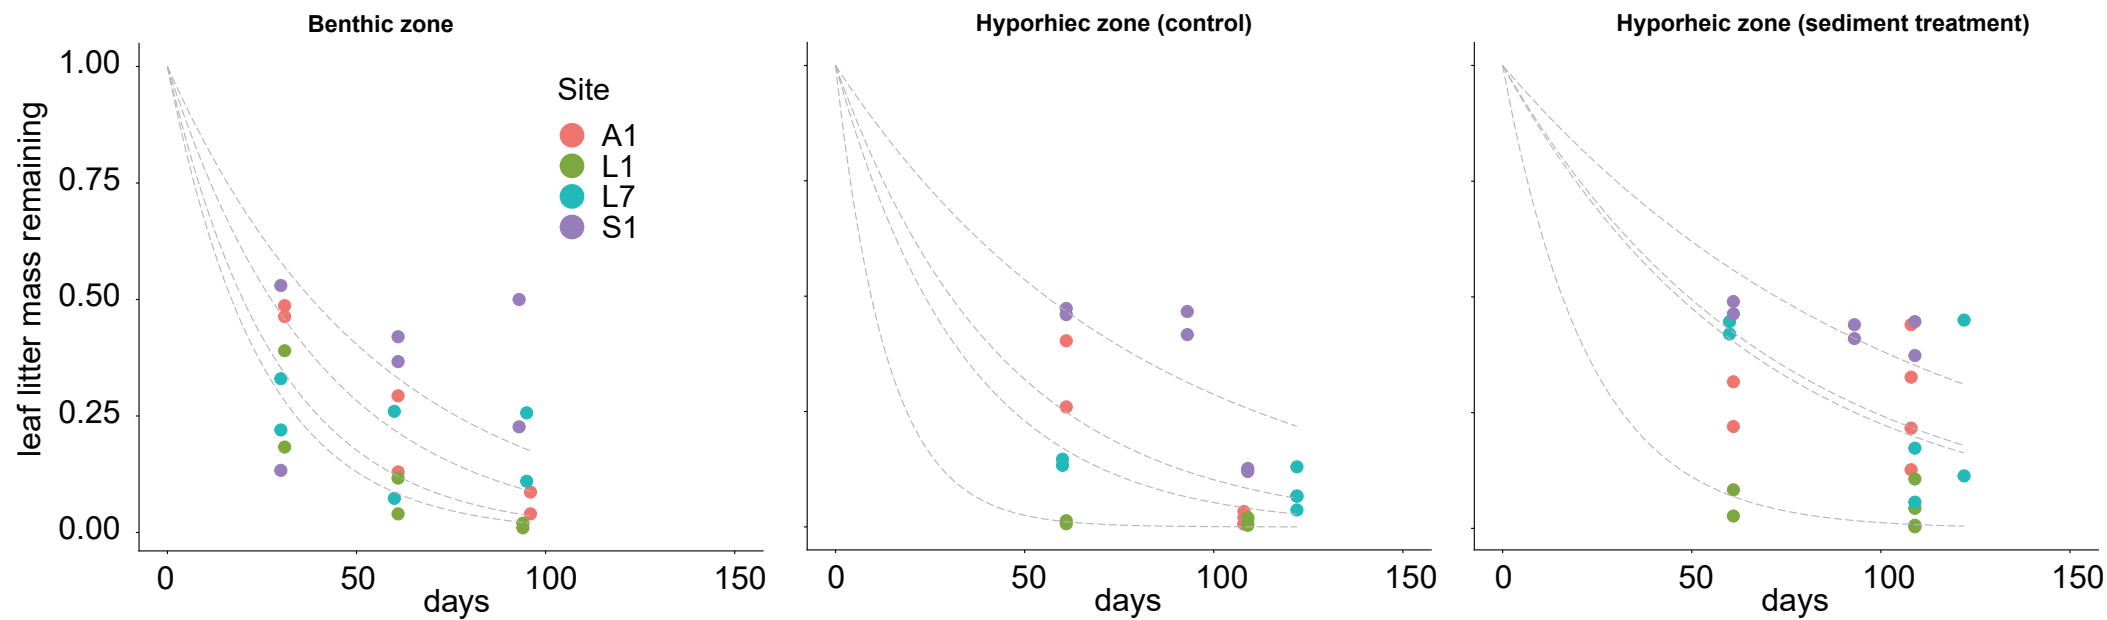

## S4 Alam et al.

Temporal changes of remaining leaf litter mass (fraction) after the installation (day 0) in relation to habitat-treatment groups and sites. Dotted lines represent regressions based on nonlinear least square regression models.
