# Supplementary material for: Additive Effects of Sediment and Nutrient on Leaf Litter Decomposition and Macroinvertebrates in Hyporheic Zone
Source: MDPI journal article supplement (doi:10.3390/w13101340), 2021-05-12
Supplement: s1 [file s1]

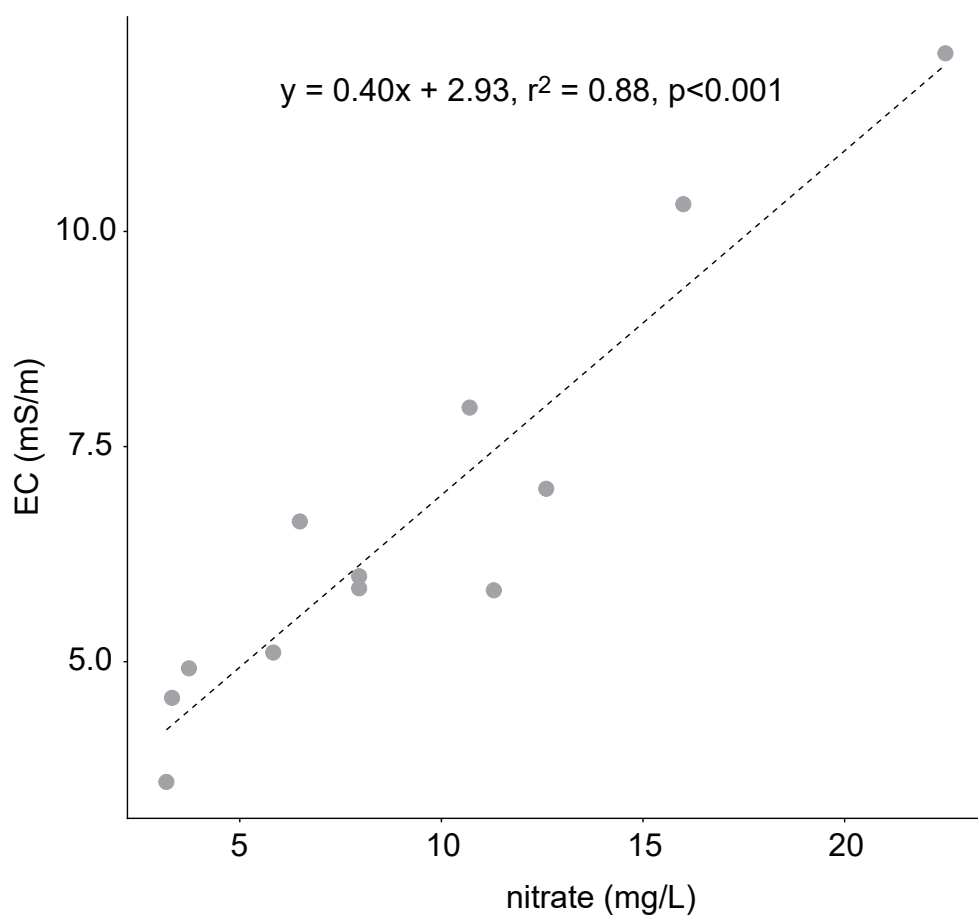

S6 Alam et al.

A relationship between electrical conductivity and nitrate in the surface-water (benthic) zone. A dotted line denotes a regression line.
