# Supplementary material for: Additive Effects of Sediment and Nutrient on Leaf Litter Decomposition and Macroinvertebrates in Hyporheic Zone
Source: MDPI journal article supplement (doi:10.3390/w13101340), 2021-05-12
Supplement: s1 [file s1]

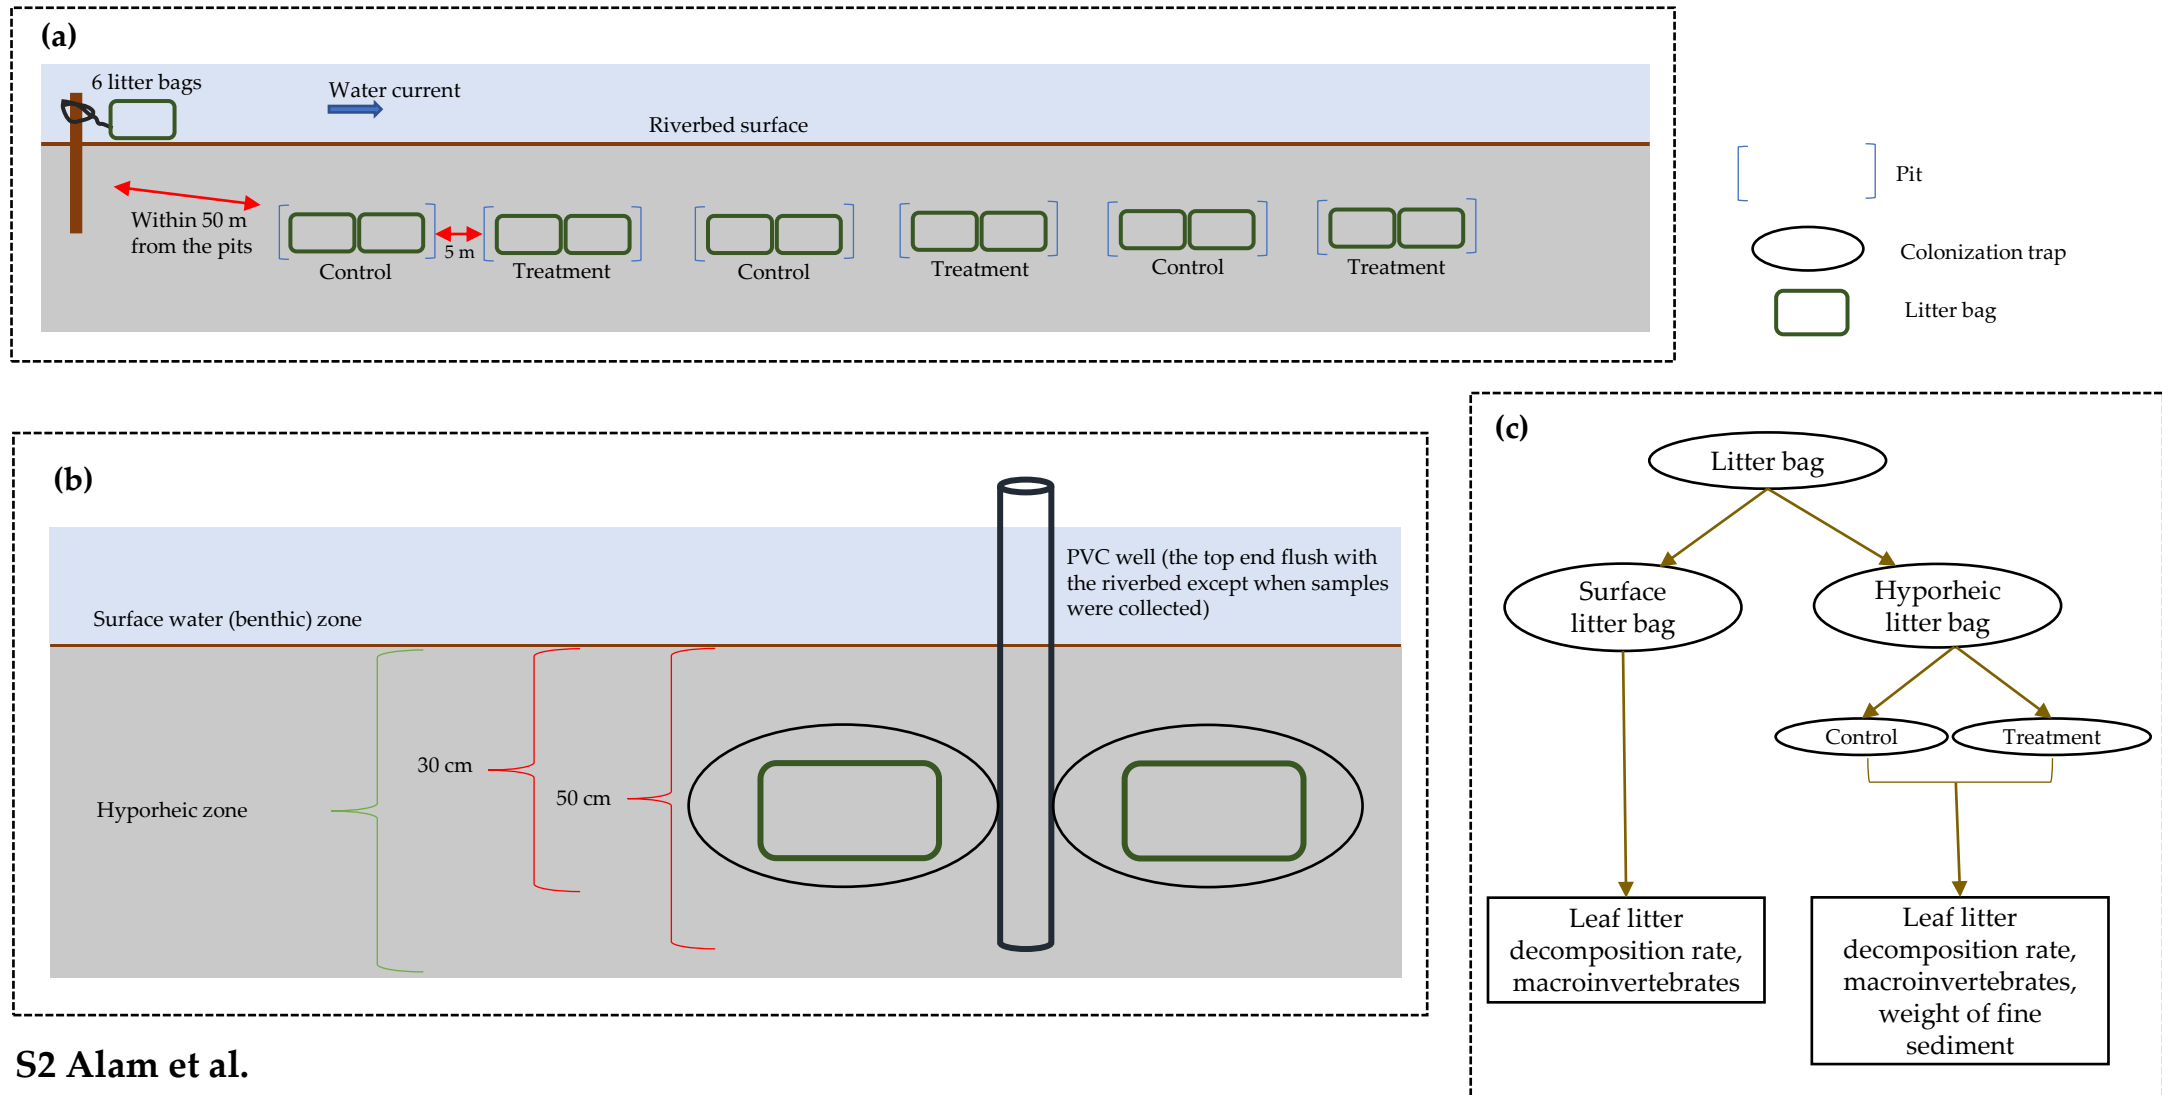

## S2 Alam et al.

Diagram showing the sampling design of each site detailing the longitudinal locations of litter bags in hyporheic control and treatment pits (two litter bags in one pit) in relation to litter bags in surface water (benthic) zone (a), a magnified view of a pit (control and/or, treatment) with hyporheic well for collecting water sample (b), and simplified steps of sample collection from litter bags (c). The treatment pits were manipulated by adding fine sediment on top of litter bags
