# Supplementary material for: Additive Effects of Sediment and Nutrient on Leaf Litter Decomposition and Macroinvertebrates in Hyporheic Zone
Source: MDPI journal article supplement (doi:10.3390/w13101340), 2021-05-12
Supplement: s1 [file s1]

Archive with 10 entries (9 files):
- updated figures alam et al. water/
- updated figures alam et al. water/Fig S1 litter bag and colonization trap_fine_Alam et al.,_20210513.pdf
- updated figures alam et al. water/Fig S2_study setup_Alam et al.,_20210513.pdf
- updated figures alam et al. water/Fig S3 sediment addition_Alam et al.,_20210513.pdf
- updated figures alam et al. water/Fig S4 decay patterns of leaf mass_Alam et al.,_20210513.pdf
- updated figures alam et al. water/Fig S5 temperature dependent k_fine_Alam et al.,_20210513.pdf
- updated figures alam et al. water/Fig S6 nitrate calibration_Alam et al.,_20210513.pdf
- updated figures alam et al. water/Table S1 litter bag collection schedule_Alam et al.,_20210513.pdf
- updated figures alam et al. water/Table S2 Summary of sampling dates_waterQ_Alam et al.,_20210513.pdf
- updated figures alam et al. water/Table S3 summary of invertebrates_Alam et al.,_20210513.pdf
