# Supplementary material for: Additive Effects of Sediment and Nutrient on Leaf Litter Decomposition and Macroinvertebrates in Hyporheic Zone
Source: MDPI journal article supplement (doi:10.3390/w13101340), 2021-05-12
Supplement: s1 [file s1 › updated figures alam et al. water/Fig S1 litter bag and colonization trap_fine_Alam et al.,_20210513.pdf]

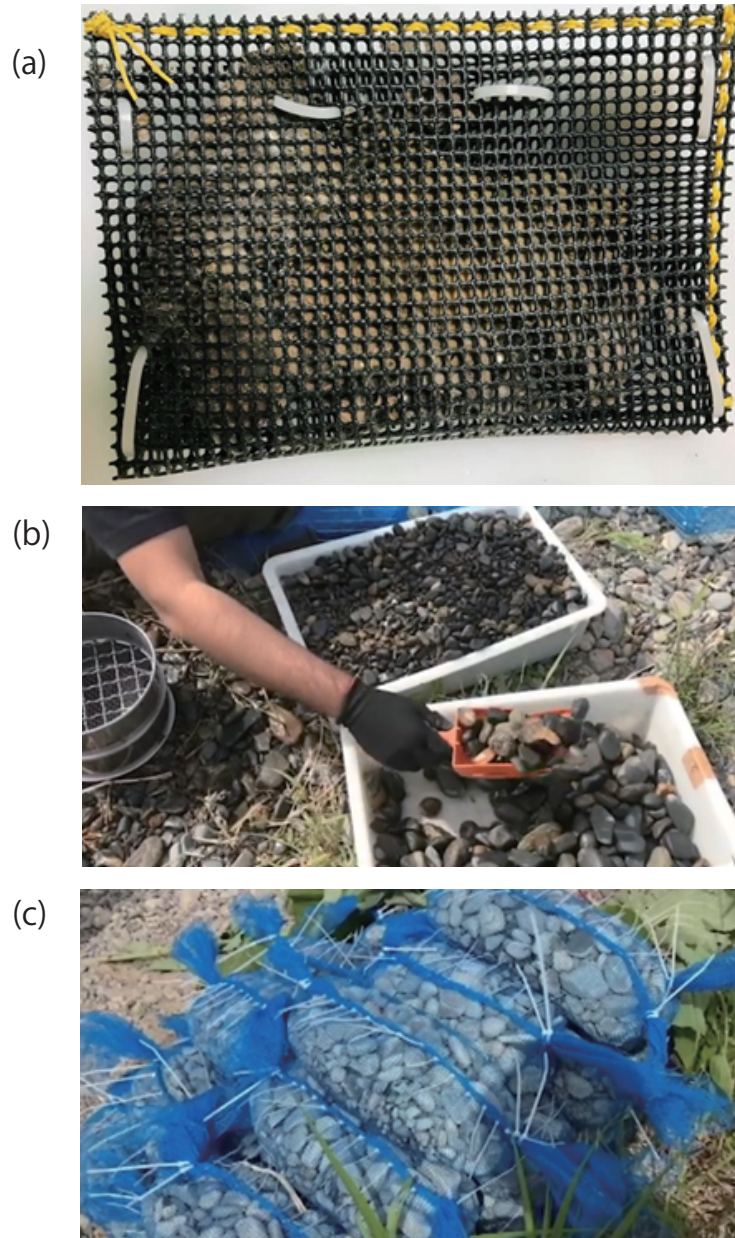

## S1 Alam et al.

Photos showing a litter bag that contains dried leaves of *Alnus japonica* (a), mixed sediment used for colonization traps (b), and prepared colonization traps before the installation (c).
